# Supplementary material
Source: publisher figshare collection journal article supplement (https://acs.figshare.com/ndownloader/files/4201261)

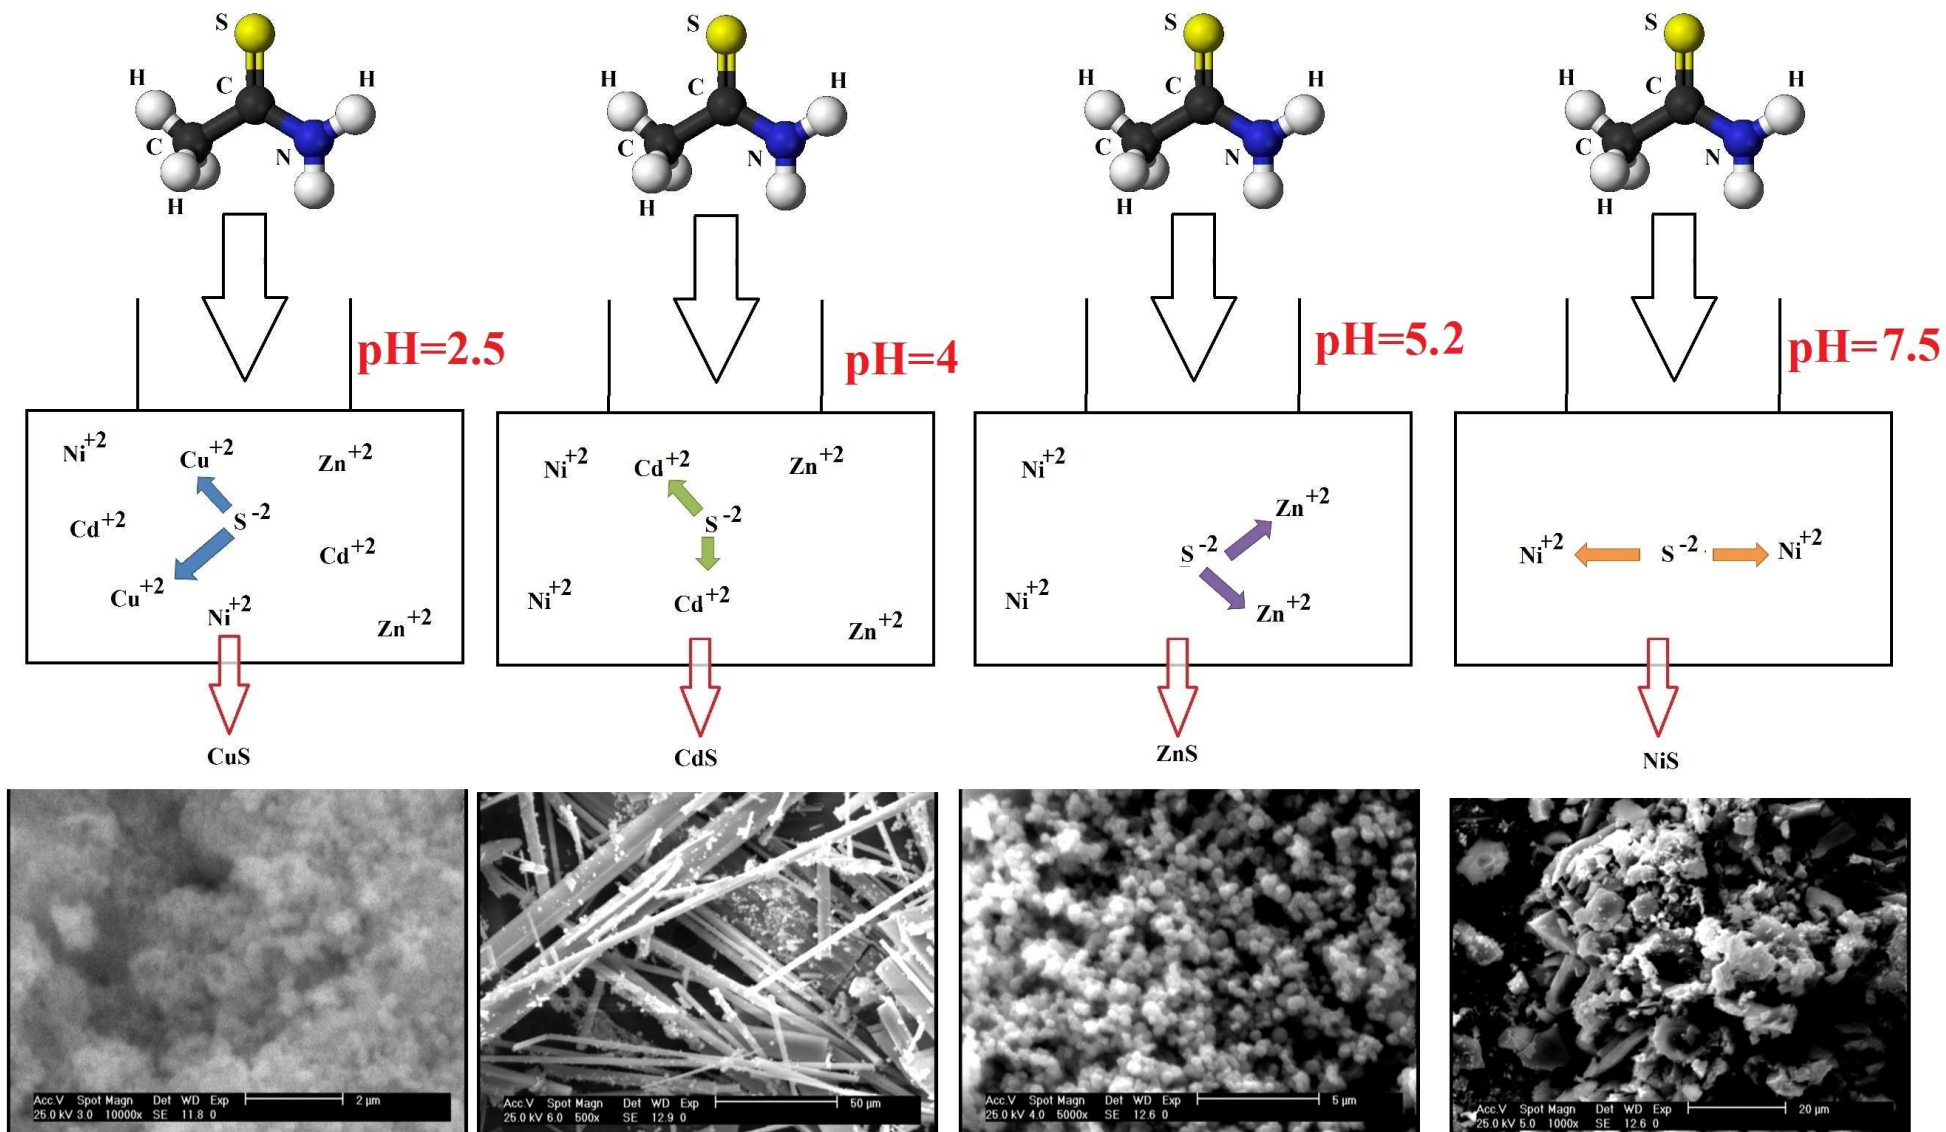

**Selective metal precipitation at various pH**

Supplement: Supplementary file 1 [file 4201261]
